# Supplementary material for: Unraveling the first world pandemic in an ancient cosmopolitan city with archaeological and genetic evidence
Source: Research Square preprint supplement (doi:10.21203/rs.3.rs-3688671/v1), 2024-01-10
Supplement: Supplementary file 1 [file SupplementalTable_S2.xlsx]

## Sheet: Sheet1
Table S2: The sequence similarity between all the 8 Jerash samples was carried out on the basis of ANI (Average nucleotide identity) values using pyani v0.2.11 (Pritchard, L., 2016). A matrix was created using the identity values for all the Individual Jerash strains.
	Individual8	Individual4	Individual7	Individual1	Individual6	Individual2	Individual5	Individual3
Individual8		0.980935	0.983136	0.967905	0.980935	0.964978	0.980261	0.98223
Individual4	0.980935		0.985701	0.966843	0.978655	0.964589	0.982489	0.982411
Individual7	0.983136	0.985701		0.966118	0.978759	0.965159	0.983629	0.981194
Individual1	0.967905	0.966843	0.966118		0.96547	0.954464	0.96591	0.968413
Individual6	0.980935	0.978655	0.978759	0.96547		0.966998	0.974925	0.981245
Individual2	0.964978	0.964589	0.965159	0.954464	0.966998		0.964438	0.965936
Individual5	0.980261	0.982489	0.983629	0.96591	0.974925	0.964438		0.978292
Individual3	0.98223	0.982411	0.981194	0.968413	0.981245	0.965936	0.978292
