# Supplementary material for: Unraveling the first world pandemic in an ancient cosmopolitan city with archaeological and genetic evidence
Source: Research Square preprint supplement (doi:10.21203/rs.3.rs-3688671/v1), 2024-01-10
Supplement: Supplementary file 2 [file SupplementalTable_S3.xlsx]

## Sheet: samples
Supplemental Table S3(A) Ancient Genomes of Y. pestis used in this study
Pandemics	Strain	Group	Country	Bibliography	Date	NCBI Project ID	SRA ID
aDNA/1st Pandemic	AE1175	1st Pandemic	Germany	Feldman et al. 2016	426-571 CE	PRJEB14851	ERR1546643
aDNA/Prehistoric Plague	KunilaII	Prehistoric Plague	Kunila, Estonia	Valtueña et al. 2017	3,960 ± 40 BP	SAMEA104233047	ERR2112547
aDNA/Prehistoric Plague	6Post	Prehistoric Plague	Augsburg, Germany	Valtueña et al. 2017	3,574 ± 19	SAMEA104233048	ERR2112549
aDNA/Prehistoric Plague	RT5/RT6	Prehistoric Plague	Mikhailovsky, Russia	Spyrou et al. 2018	3868–3704 calBP	PRJEB24296	ERR2261888
aDNA/2nd Pandemic	Ber37	14th-15th c.	Bergen op Zoom, The Netherland	Namouchi et al. 2018	1358-1360	PRJEB24499	ERR2862146
aDNA/2nd Pandemic	Ber45	14th-15th c.	Bergen op Zoom, The Netherland	Namouchi et al. 2018	1358-1360	PRJEB24499	ERR2862147
aDNA/2nd Pandemic	OSL1	14th-15th c.	Oslo, Norway	Namouchi et al. 2018	ca. 1350	PRJEB24499	ERR2862149
aDNA/1st Pandemic	EDI001	1st Pandemic	Edix Hill, UK	Keller et al. 2019	500–550	PRJEB29991	ERR3341118
aDNA/1st Pandemic	EDI003	1st Pandemic	Edix Hill, UK	Keller et al. 2019	500–550	PRJEB29991	ERR3341119
aDNA/1st Pandemic	EDI004	1st Pandemic	Edix Hill, UK	Keller et al. 2019	500–550	PRJEB29991	ERR3341121
aDNA/1st Pandemic	LSD001	1st Pandemic	Saint-Doulchard, France	Keller et al. 2019	750–800?	PRJEB29991	ERR3341125
aDNA/1st Pandemic	LSD023	1st Pandemic	Saint-Doulchard, France	Keller et al. 2019		PRJEB29991	ERR3341138
aDNA/1st Pandemic	LVC_merged	1st Pandemic	Lunel-Viel Quartier centrale, France	Keller et al. 2019	400–600	PRJEB29991	ERR3341143
aDNA/1st Pandemic	PET004	1st Pandemic	Petting, Germany	Keller et al. 2019	570–600	PRJEB29991	ERR3341146
aDNA/1st Pandemic	UNT003	1st Pandemic	Unterthürheim, Germany	Keller et al. 2019	550–600	PRJEB29991	ERR3341150
aDNA/1st Pandemic	VAL001	1st Pandemic	Valencia, Spain	Keller et al. 2019	500–700	PRJEB29991	ERR3341154
aDNA/2nd Pandemic	STA001	15th-17th c.	Starnberg, Germany	Spyrou et al. 2019	1433-1523	PRJEB29990	ERR3457869
aDNA/Prehistoric Plague	GLZ001	Prehistoric Plague	Irkutsk city, Siberia, Russia	Yu et al. 2020	2838-2495 BC	PRJEB37007	ERR4093960
aDNA/Prehistoric Plague	GLZ002	Prehistoric Plague	Irkutsk city, Siberia, Russia	Yu et al. 2020	2568-2350 BC	PRJEB37007	ERR4093962
aDNA/1st Pandemic	A120	1st Pandemic	Aschheim, Bavaria, Germany	Wagner et al. 2014	533 ± 98 CE	PRJNA231474	SRR1048648
aDNA/1st Pandemic	A76	1st Pandemic	Aschheim, Bavaria, Germany	Wagner et al. 2014	504 ± 61 CE	PRJNA231474	SRR1048652
aDNA/Prehistoric Plague	RISE505	Prehistoric Plague	Kytmanovo, Russia	Rassmusen et al. 2015	1746–1626 BCE	PRJEB10885	ERR1018890
aDNA/2nd Pandemic	OBS107	18th c.	Marseille, France	Bos et al. 2016	1722	PRJEB12163	ERR1193537
aDNA/1st Pandemic	DA101	1st Pandemic	Uch Kurbu	AD	～200 CE	PRJEB25891	ERR2503176, ERR2503177, ERR2503178, ERR2503180, ERR2503182 (combined)
aDNA/2nd Pandemic	COL001	14th-15th c.	Collalto Sabino, Italy	Guellil et al. 2020	14th C	PRJEB27821	ERR4570270
aDNA/2nd Pandemic	G701	15th-17th c.	Riga, Latvia	Susat et al. 2020	1550-1650	PRJEB36413	ERR3841646
aDNA/Prehistoric Plague	Gok2	Prehistoric Plague	Falbygden, Sweden	Rascovan et al. 2019	4900 BP	PRJEB6090	ERR476776
aDNA/Prehistoric Plague	Gyvakarai1	Prehistoric Plague	Gyvakarai, Lithuania	Valtueña et al. 2017	4,030 ± 30 BP	SAMEA104233046	ERR2112546
aDNA/Prehistoric Plague	1343UNTA85	Prehistoric Plague	Augsburg, Germany	Valtueña et al. 2017	3,819 ± 24 BP	SAMEA104233049	ERR2112577
aDNA/Prehistoric Plague	GEN72	Prehistoric Plague	Beli Manastir-Popova zemlja, Croatia	Valtueña et al. 2017	4,176 ± 28 BP	SAMEA104233050	ERR2112582
aDNA/Prehistoric Plague	RK1001	Prehistoric Plague	Rasshevatskiy, Russia	Valtueña et al. 2017	4,171 ± 22 BP	SAMEA104233051	ERR2112586
Supplemental Table S3(B) Modern Genomes of Y. pestis used in this study
Organism Scientific Name	SelectionForTree		Organism Qualifier	Taxonomy id	Assembly Name	Assembly Accession	Source	Annotation	Size	Submission Date	Gene Count	BioProject	BioSample
Yersinia pestis KIM10+	yes		strain: KIM	187410	ASM664v1	GCA_000006645.1	GenBank	Annotation submitted by Univ. Wisconsin	4701745	2002-07-29	4359	PRJNA288	SAMN02604093
Yersinia pestis biovar Microtus str. 91001	yes		strain: 91001	229193	ASM788v1	GCA_000007885.1	GenBank	Annotation submitted by Academy of Military Medical Sciences, The Institute of Microbiology and Epidemiology, China	4803217	2004-03-15	4277	PRJNA10638	SAMN02602970
Yersinia pestis Nepal516	yes		strain: Nepal516	377628	ASM1380v1	GCA_000013805.1	GenBank	Annotation submitted by DOE Joint Genome Institute	4646286	2006-06-09	4203	PRJNA16646	SAMN02598370
Yersinia pestis Pestoides F	yes		strain: Pestoides F	386656	ASM1644v1	GCA_000016445.1	GenBank	Annotation submitted by US DOE Joint Genome Institute	4725862	2007-04-13	4262	PRJNA16700	SAMN02598373
Yersinia pestis Angola	yes		strain: Angola	349746	ASM1880v1	GCA_000018805.1	GenBank	Annotation submitted by TIGR	4687014	2007-12-12	4469	PRJNA16067	SAMN02604042
Yersinia pestis biovar Medievalis str. Harbin 35	yes		strain: Harbin 35	547048	ASM18672v1	GCA_000186725.1	GenBank	Annotation submitted by ERIC (Enteropathogen Resource Integration Center)	4709501	2011-01-25	4670	PRJNA30505	SAMN02603222
Yersinia pestis MGJZ11	yes		strain: MGJZ11	755959	ASM32520v1	GCA_000325205.1	GenBank		4516720	2012-12-07		PRJNA47685	SAMN02403094
Yersinia pestis MGJZ12	yes		strain: MGJZ12	755960	ASM32522v1	GCA_000325225.1	GenBank		4438965	2012-12-07		PRJNA47685	SAMN02403095
Yersinia pestis	yes		strain: Harbin35	632	ASM83427v1	GCA_000834275.1	GenBank	Annotation submitted by Los Alamos National Laboratory	4709246	2015-02-09	4378	PRJNA240100	SAMN02769655
Yersinia pestis Pestoides F	yes		strain: Pestoides F	386656	ASM83431v1	GCA_000834315.1	GenBank	Annotation submitted by Los Alamos National Laboratory	4728318	2015-02-09	4278	PRJNA239345	SAMN03121016
Yersinia pestis Angola	yes		strain: Angola	349746	ASM83484v1	GCA_000834845.1	GenBank	Annotation submitted by Los Alamos National Laboratory	4674610	2015-02-09	4395	PRJNA240101	SAMN03177051
Yersinia pestis	yes		strain: Nicholisk 41	632	ASM83488v1	GCA_000834885.1	GenBank	Annotation submitted by Los Alamos National Laboratory	4700481	2015-02-09	4295	PRJNA240108	SAMN03216612
Yersinia pestis str. Pestoides B	yes		strain: Pestoides B	748678	ASM83492v1	GCA_000834925.1	GenBank	Annotation submitted by Los Alamos National Laboratory	4794427	2015-02-09	4337	PRJNA240105	SAMN03218157
Yersinia pestis Pestoides G	yes		strain: Pestoides G	649716	ASM83498v1	GCA_000834985.1	GenBank	Annotation submitted by Los Alamos National Laboratory	4738142	2015-02-09	4294	PRJNA240082	SAMN03202985
Yersinia pestis	yes		strain: KIM5	632	ASM97010v1	GCA_000970105.1	GenBank	Annotation submitted by Los Alamos National Laboratory	4787503	2015-04-07	4333	PRJNA240083	SAMN03160723
Yersinia pestis 1412	yes		strain: 1412	1345703	ASM118869v1	GCA_001188695.1	GenBank	Annotation submitted by Los Alamos National Laboratory	4733482	2015-07-30	4326	PRJNA208250	SAMN03782999
Yersinia pestis 1522	yes		strain: 1522	1345705	ASM118871v1	GCA_001188715.1	GenBank	Annotation submitted by Los Alamos National Laboratory	4738644	2015-07-30	4329	PRJNA208252	SAMN03783057
Yersinia pestis	yes		strain: 195/P	632	ASM200528v1	GCA_002005285.1	GenBank		4831198	2017-02-21		PRJNA357858	SAMN06161235
Yersinia pestis	yes		strain: FDAARGOS_603	632	ASM379820v1	GCA_003798205.1	GenBank	NCBI Prokaryotic Genome Annotation Pipeline	4929654	2018-11-20	4757	PRJNA231221	SAMN10228583
Yersinia pestis	yes		strain: FDAARGOS_602	632	ASM379834v1	GCA_003798345.1	GenBank	NCBI Prokaryotic Genome Annotation Pipeline	4784489	2018-11-20	4566	PRJNA231221	SAMN10228582
Yersinia pestis	yes		strain: SCPM-O-DNA-18 (I-3113)	632	ASM929594v1	GCA_009295945.1	GenBank	NCBI Prokaryotic Genome Annotation Pipeline (PGAP)	4759144	2019-10-24	4531	PRJNA269675	SAMN12991206
Yersinia pestis	yes		strain: SCPM-O-B-5935 (I-1996)	632	ASM929596v1	GCA_009295965.1	GenBank	NCBI Prokaryotic Genome Annotation Pipeline (PGAP)	4807288	2019-10-24	4537	PRJNA269675	SAMN12991208
Yersinia pestis subsp. pestis bv. Medievalis	yes		strain: SCPM-O-B-6530	1234662	ASM929598v1	GCA_009295985.1	GenBank	NCBI Prokaryotic Genome Annotation Pipeline (PGAP)	4783760	2019-10-24	4542	PRJNA269675	SAMN07176224
Yersinia pestis	yes		strain: SCPM-O-B-6291 (C-25)	632	ASM929600v1	GCA_009296005.1	GenBank	NCBI Prokaryotic Genome Annotation Pipeline (PGAP)	4614086	2019-10-24	4347	PRJNA269675	SAMN12991209
Yersinia pestis	yes		strain: SCPM-O-B-5942 (I-2638)	632	ASM936319v1	GCA_009363195.1	GenBank	NCBI Prokaryotic Genome Annotation Pipeline (PGAP)	4848320	2019-10-27	4594	PRJNA269675	SAMN12991207
Yersinia pestis	yes		strain: 14D	632	ASM1515961v2	GCA_015159615.2	GenBank	NCBI Prokaryotic Genome Annotation Pipeline (PGAP)	4601712	2021-04-27	4102	PRJNA669044	SAMN16431992
Yersinia pestis	yes		strain: S19960127	632	ASM1519065v1	GCA_015190655.1	GenBank	Annotation submitted by National institute for communicable disease control and prevention	4852443	2020-11-02	4669	PRJNA577233	SAMN13021983
Yersinia pestis	yes		strain: C-781	632	ASM1533608v1	GCA_015336085.1	GenBank	NCBI Prokaryotic Genome Annotation Pipeline (PGAP)	4604910	2020-11-10	4093	PRJNA673664	SAMN16619712
Yersinia pestis	yes		strain: M2029	632	ASM1533626v1	GCA_015336265.1	GenBank	NCBI Prokaryotic Genome Annotation Pipeline (PGAP)	4644349	2020-11-10	4127	PRJNA673664	SAMN16619718
Yersinia pestis	yes		strain: I-1252	632	ASM1533646v1	GCA_015336465.1	GenBank	NCBI Prokaryotic Genome Annotation Pipeline (PGAP)	4616538	2020-11-10	4097	PRJNA673664	SAMN16619721
Yersinia pestis	yes		strain: M2086	632	ASM1533669v1	GCA_015336695.1	GenBank	NCBI Prokaryotic Genome Annotation Pipeline (PGAP)	4617857	2020-11-10	4112	PRJNA673664	SAMN16619723
Yersinia pestis	yes		strain: M-1974	632	ASM1533686v1	GCA_015336865.1	GenBank	NCBI Prokaryotic Genome Annotation Pipeline (PGAP)	4612708	2020-11-10	4090	PRJNA673664	SAMN16619719
Yersinia pestis	yes		strain: C-792	632	ASM1533708v2	GCA_015337085.2	GenBank	NCBI Prokaryotic Genome Annotation Pipeline (PGAP)	4481542	2021-04-27	4001	PRJNA673664	SAMN16619714
Yersinia pestis	yes		strain: C-783	632	ASM1533728v1	GCA_015337285.1	GenBank	NCBI Prokaryotic Genome Annotation Pipeline (PGAP)	4555347	2020-11-10	4075	PRJNA673664	SAMN16619713
Yersinia pestis	yes		strain: KM 567	632	ASM1533744v1	GCA_015337445.1	GenBank	NCBI Prokaryotic Genome Annotation Pipeline (PGAP)	4499502	2020-11-10	4031	PRJNA673664	SAMN16619715
Yersinia pestis	yes		strain: M-1482	632	ASM1533764v1	GCA_015337645.1	GenBank	NCBI Prokaryotic Genome Annotation Pipeline (PGAP)	4610990	2020-11-10	4103	PRJNA673664	SAMN16619716
Yersinia pestis	yes		strain: M-1770	632	ASM1533782v2	GCA_015337825.2	GenBank	NCBI Prokaryotic Genome Annotation Pipeline (PGAP)	4612530	2021-04-27	4105	PRJNA673664	SAMN16619717
Yersinia pestis	yes		strain: M2085	632	ASM1533804v2	GCA_015338045.2	GenBank	NCBI Prokaryotic Genome Annotation Pipeline (PGAP)	4636545	2021-04-27	4118	PRJNA673664	SAMN16619720
Yersinia pestis	yes		strain: C-830	632	ASM1533820v1	GCA_015338205.1	GenBank	NCBI Prokaryotic Genome Annotation Pipeline (PGAP)	4501826	2020-11-10	4028	PRJNA673664	SAMN16619722
Yersinia pestis	yes		strain: R	632	ASM2449837v1	GCA_024498375.1	GenBank	NCBI Prokaryotic Genome Annotation Pipeline (PGAP)	4848095	2022-08-01	4412	PRJNA766482	SAMN21848823
Yersinia pestis	yes		strain: 94	632	ASM2449839v1	GCA_024498395.1	GenBank	NCBI Prokaryotic Genome Annotation Pipeline (PGAP)	4834935	2022-08-01	4391	PRJNA766481	SAMN21848822
