# Supplementary material for: Unraveling the first world pandemic in an ancient cosmopolitan city with archaeological and genetic evidence
Source: Research Square preprint supplement (doi:10.21203/rs.3.rs-3688671/v1), 2024-01-10
Supplement: Supplementary file 3 [file SupplenetalTable_S1.xlsx]

## Sheet: Sheet1
Supplement Table S1: Potential Y pestis peptide found in ancient proteomics by MaxQuant
Protein IDs	Sequence IDs	Peptides	Razor + unique peptides	Unique peptides	Mol. weight [kDa]	Sequence length	Q-value	Peptide sequences	Peptide is razor
W2-100
A0A0H2Y5W0	tr|A0A0H2Y5W0|A0A0H2Y5W0_YERPA Uncharacterized protein OS=Yersinia pestis bv. Antiqua (strain Antiqua) OX=360102 GN=YPA_1497 PE=4 SV=1	1	1	1	34.141	320	0	CRHANRR	True
P31522;P0C873;B1JS09;A0T2N0;A0A873UFZ4;A0A5P8RWW0;A0A3G5L9J3;A0A3G5J355;A0A0U1QVA0;A0A0T9P132;A0A0H2YKV2;A0A0E1NRM7;A0A0E8XDN7;A0A380Q6R1	sp|P31522|PSAA_YERPE pH 6 antigen OS=Yersinia pestis OX=632 GN=psaA PE=1 SV=1;sp|P0C873|PSAA_YERPS pH 6 antigen OS=Yersinia pseudotuberculosis serotype I (strain IP32953) OX=273123 GN=psaA PE=3 SV=1;sp|B1JS09|PSAA_YERPY pH 6 antigen OS=Yersinia pseudotuber	1	1	1	17.232	158	0	KMKCFAK	True
Q66D15;Q0WHK7;A0A5P8RXF7;A0A3N4B7Z6;A0A3G5KGN2;A0A0U1QXF5;A0A0T9PVQ6;A0A0T9J4G5;A0A0H3B5D7;A0A0H2YJG2;A0A0E8XFU8;A0A0E1NQ18	tr|Q66D15|Q66D15_YERPS Putative pyridoxal-dependent decarboxylase OS=Yersinia pseudotuberculosis serotype I (strain IP32953) OX=273123 GN=YPTB1234 PE=3 SV=1;tr|Q0WHK7|Q0WHK7_YERPE Aspartate aminotransferase family protein OS=Yersinia pestis OX=632 GN=dcd P	1	1	1	52.114	471	0	LWLLLQSLVK	True
W2-110
Q0WGX7;Q66CE5;A0A873VGP9;A0A5P8RV57;A0A3G5L8U9;A0A3G5J8D8;A0A380Q758;A0A0U1QYS6;A0A0H3B625;A0A0H2YKV5;A0A0E8XE04;A0A0E1NXY8	tr|Q0WGX7|Q0WGX7_YERPE DNA helicase OS=Yersinia pestis OX=632 GN=YPO1440 PE=3 SV=1;tr|Q66CE5|Q66CE5_YERPS DNA helicase OS=Yersinia pseudotuberculosis serotype I (strain IP32953) OX=273123 GN=YPTB1458 PE=4 SV=1;tr|A0A873VGP9|A0A873VGP9_YERPE DNA helicase IV	1	1	1	75.618	661	0	ADYECCLRWLQQGRHSVER	True
Q66AI1;A4TJ45;A0A386HEX8;A0A481QBS6;A0A7U5PGQ7;A0A0E8XN64;Q1C7L9;P58644;B2K4I4;B1JKQ0;A9R8T1;A7FI10;A0A857EZV9;A0A873VK86;Q1CJ05;A0A5P8RUG7;A0A3G5LB57;A0A3G5KJA9;A0A380Q8Z7;A0A0T9P1F3	sp|Q66AI1|PYRF_YERPS Orotidine 5-phosphate decarboxylase OS=Yersinia pseudotuberculosis serotype I (strain IP32953) OX=273123 GN=pyrF PE=3 SV=1;sp|A4TJ45|PYRF_YERPP Orotidine 5-phosphate decarboxylase OS=Yersinia pestis (strain Pestoides F) OX=386656 GN=	1	1	1	26.237	245	0	AVAAAAELGVWMVNVHASGGAR	True
A0A0H2W045	tr|A0A0H2W045|A0A0H2W045_YERPE Uncharacterized protein OS=Yersinia pestis OX=632 GN=YP_pCD10 PE=4 SV=1	1	1	1	9.0627	80	0	PYPYVDATTHLVGTRAGRYASR	True
W2-118
Q66FL2;A0A5P8RP54;A0A3G5LCU7;A0A3G5KEP0;A0A380QDU7;A0A380PJS2;A0A0U1QUS2;A0A0H2YME7;A0A0E1NPK5;A0A0T9R3Z6	tr|Q66FL2|Q66FL2_YERPS Type III secretion system apparatus protein OS=Yersinia pseudotuberculosis serotype I (strain IP32953) OX=273123 GN=YPTB0324 PE=4 SV=1;tr|A0A5P8RP54|A0A5P8RP54_YERPE Type III secretion protein OS=Yersinia pestis subsp. pestis bv. Med	1	1	1	16.308	133	0	REQQQQEQQLENGR	True
Q66DX7;A0A5P8YJE6;A0A5P8RRM2;A0A3G5LE48;A0A3G5KQ09;A0A380Q5I4;A0A0U1R221;A0A0T9QT51;A0A0H3B7G3;A0A0H2YH41;A0A0E8XEU2;A0A0E1NUY4	tr|Q66DX7|Q66DX7_YERPS Nuclease SbcCD subunit D OS=Yersinia pseudotuberculosis serotype I (strain IP32953) OX=273123 GN=sbcD PE=3 SV=1;tr|A0A5P8YJE6|A0A5P8YJE6_YERPE Nuclease SbcCD subunit D OS=Yersinia pestis OX=632 GN=sbcD PE=3 SV=1;tr|A0A5P8RRM2|A0A5P8R	1	1	1	46.607	414	0	EQRNNSIHR	True
Q667D0;A0A380QCX1;A0A0U1R3A8;A0A0H3B2G3;A0A0E8XGN1;A0A0H2W7T5	tr|Q667D0|Q667D0_YERPS Putative general secretion pathway protein F OS=Yersinia pseudotuberculosis serotype I (strain IP32953) OX=273123 GN=gspF PE=3 SV=1;tr|A0A380QCX1|A0A380QCX1_YERPU General protein secretion protein OS=Yersinia pseudotuberculosis OX=63	1	1	1	44.621	400	0	ILLFNKYVVK	True
A0A0E1NL01;A0A0H2W1R2;O68729;A0A5P8RZP6;A0A2S9PDY7;A0A0H2YMR1	tr|A0A0E1NL01|A0A0E1NL01_YERPA Membrane protein OS=Yersinia pestis bv. Antiqua (strain Antiqua) OX=360102 GN=YPA_MT0011 PE=4 SV=1;tr|A0A0H2W1R2|A0A0H2W1R2_YERPE Putative membrane protein OS=Yersinia pestis OX=632 GN=YP_pMT012 PE=4 SV=1;tr|O68729|O68729_YER	1	1	1	53.1	507	0	PGGSLNPNSQR	True
A0A0H2YMQ7;A0A0E1NL10;A0A5P8RZN5;A0A3G5LHW1;A0A0H2W1Q5	tr|A0A0H2YMQ7|A0A0H2YMQ7_YERPN Phage tail protein OS=Yersinia pestis bv. Antiqua (strain Nepal516) OX=377628 GN=YPN_MT0006 PE=4 SV=1;tr|A0A0E1NL10|A0A0E1NL10_YERPA Phage tail protein OS=Yersinia pestis bv. Antiqua (strain Antiqua) OX=360102 GN=YPA_MT0006 P	1	1	1	169	1543	0	RLPLLIAGAGGK	True
P17778;A0A5P8S116;A0A3G5L5J2;A0A3G5K9P6;E8PSM7;A0A6B3T633;A0A0J9X1Z0;Q84GT9;Q663L9	sp|P17778|YOPM_YERPE Outer membrane protein YopM OS=Yersinia pestis OX=632 GN=yopM PE=1 SV=2;tr|A0A5P8S116|A0A5P8S116_YERPE Type III secretion system effector YopM OS=Yersinia pestis subsp. pestis bv. Medievalis OX=1234662 GN=yopM PE=3 SV=1;tr|A0A3G5L5J2|A	1	1	1	46.203	409	0	TEYYNAWSEWER	True
A0A2C8CTJ9	tr|A0A2C8CTJ9|A0A2C8CTJ9_YERPE IncF plasmid conjugative transfer pilus assembly protein TraC OS=Yersinia pestis OX=632 GN=virB4 PE=4 SV=1	1	1	1	101.96	893	0	VNNYFSTTDAEYERMKNIR	True
W3-69
Q0WFG3;A0A873U3R5;A0A5P8RVS9;A0A3G5LAJ3;A0A0H2YG84;A0A0H2W4H3;A0A0E1NVF9	tr|Q0WFG3|Q0WFG3_YERPE Putative membrane protein OS=Yersinia pestis OX=632 GN=YPO1990 PE=4 SV=1;tr|A0A873U3R5|A0A873U3R5_YERPE DUF4034 domain-containing protein OS=Yersinia pestis OX=632 GN=ISU56_14740 PE=4 SV=1;tr|A0A5P8RVS9|A0A5P8RVS9_YERPE DUF4034 domai	1	1	1	80.756	703	0	DHLRHLIWWDDFCDDLGHK	True
Q665D6;A0A5P8RPL2;A0A3N4BAA7;A0A3G5IWQ1;A0A2S9PBP0;A0A0U1QXI0;A0A0H3B0U2;A0A0H2YLZ1;A0A0E1NVP5	tr|Q665D6|Q665D6_YERPS Putative 2-hydroxy-3-oxopropionate reductase OS=Yersinia pseudotuberculosis serotype I (strain IP32953) OX=273123 GN=YPTB3582 PE=4 SV=1;tr|A0A5P8RPL2|A0A5P8RPL2_YERPE NAD-binding protein OS=Yersinia pestis subsp. pestis bv. Medievali	1	1	1	32.112	296	0	LNYPMRLGMHCVDVWDEVSR	True
Q66EZ8;A0A5P8YL56;A0A5P8RXJ1;A0A3G5KZD1;A0A3G5IS36;A0A0U1QZ44;A0A0H3B7R8;A0A0H2YF95;A0A0E1NW71	tr|Q66EZ8|Q66EZ8_YERPS PTS system fructose-like IIB component 1 OS=Yersinia pseudotuberculosis serotype I (strain IP32953) OX=273123 GN=frwB PE=4 SV=1;tr|A0A5P8YL56|A0A5P8YL56_YERPE PTS fructose-like transporter subunit IIB OS=Yersinia pestis OX=632 GN=YPO	1	1	1	11.355	106	0	TNIIAITACPSGVAHTYMAAEALERAAR	True
A0A3G5LHN2;A0A380PJA4;A0A0H2YM19;A0A0E1NWW4;A0A0H2W8X8;Q8D1M9;Q665A3;A0A0E8XP77;A0A0U1R1L8	tr|A0A3G5LHN2|A0A3G5LHN2_YERPE DUF6531 domain-containing protein OS=Yersinia pestis OX=632 GN=EGX46_21155 PE=4 SV=1;tr|A0A380PJA4|A0A380PJA4_YERPE Putative membrane protein OS=Yersinia pestis OX=632 GN=YPO3615 PE=4 SV=1;tr|A0A0H2YM19|A0A0H2YM19_YERPN Membr	1	1	1	167.4	1512	0	IQCSDHPSSPPPMIAEGAKTVFANQKQIAR	True
